# Supplementary material
Source: PubMed Central journal article supplement (PMC8011001)
Supplement: NIHMS1507281-supplement-Supplement1.pdf [file NIHMS1507281-supplement-Supplement1.pdf]

## Supplementary Appendix

This appendix has been provided by the authors to give readers additional information about their work.

Supplement to: Tawbi HA, Forsyth PA, Algazi A, et al. Combined nivolumab and ipilimumab in melanoma metastatic to the brain. *N Engl J Med* 2018;379:722-30. DOI: [10.1056/NEJMoa1805453](https://doi.org/10.1056/NEJMoa1805453)

## Supplementary Appendix

### Contents

|                                                                                               |    |
|-----------------------------------------------------------------------------------------------|----|
| Collaborators                                                                                 | 2  |
| Figure S1. CheckMate 204 Study Design                                                         | 3  |
| Figure S2. Patient Disposition                                                                | 4  |
| Figure S3. Time to and Duration of Extracranial Response                                      | 5  |
| Table S1. Subsequent Anti-cancer Therapies                                                    | 6  |
| Table S2. Demographic and Clinical Characteristics of the Patients at Baseline                | 7  |
| Table S3. Number of Target and Non-target Lesions at Baseline                                 | 9  |
| Table S4. Intracranial Response by Number of Baseline Target Lesions                          | 10 |
| Table S5. Subgroup Analyses of Intracranial Objective Response Rate and Clinical Benefit Rate | 11 |
| Table S6. Treatment-related Adverse Events                                                    | 13 |
| Table S7. Adverse Events in the Central Nervous System                                        | 16 |

**Collaborators**

In addition to the authors, the following investigators participated in the CheckMate 204 trial: Sanjiv S. Agarwala (St. Luke's University Health Network, Easton, PA); Diwakar Davar (Hillman Cancer Center, University of Pittsburgh Medical Center, Pittsburgh, PA); Tara C. Gangadhar (Abramson Cancer Center, University of Pennsylvania, Philadelphia, PA); John A. Glaspy (Jonsson Comprehensive Cancer Center, UCLA Medical Center, Santa Monica, CA); Sekwon Jang (Inova Melanoma and Skin Cancer Center, Fairfax, VA); Jose Lutzky (Mount Sinai Comprehensive Cancer Center, Miami, FL); April K. Salama (Duke University Medical Center, Durham, NC); Amy Weise (Karmanos Cancer Institute, Wayne State University, Detroit, MI).

**Figure S1. CheckMate 204 Study Design.**

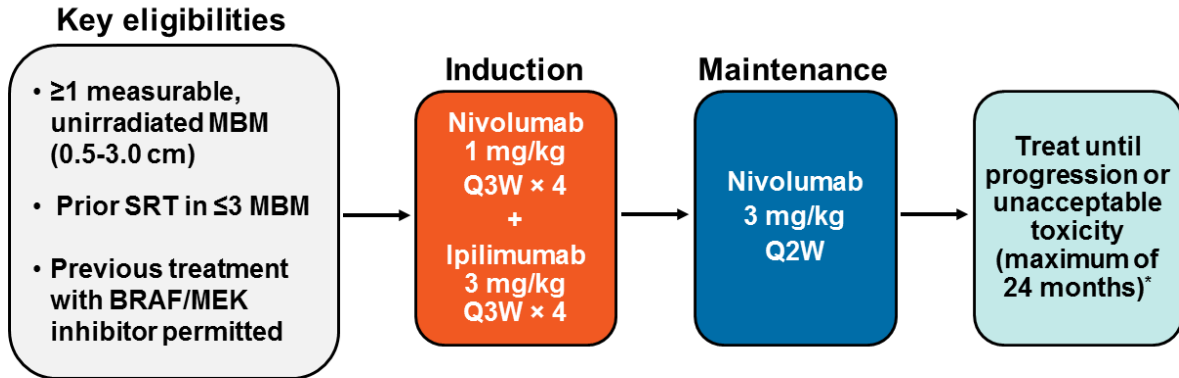

MBM denotes melanoma brain metastasis, Q2W every 2 weeks, Q3W every 3 weeks, and SRT stereotactic radiotherapy.

\*Patients with grade 3 or 4 adverse events during nivolumab plus ipilimumab induction could resume nivolumab monotherapy when the adverse event resolved; all patients who discontinued study treatment proceeded to the follow-up phase.

**Figure S2. Patient Disposition.**

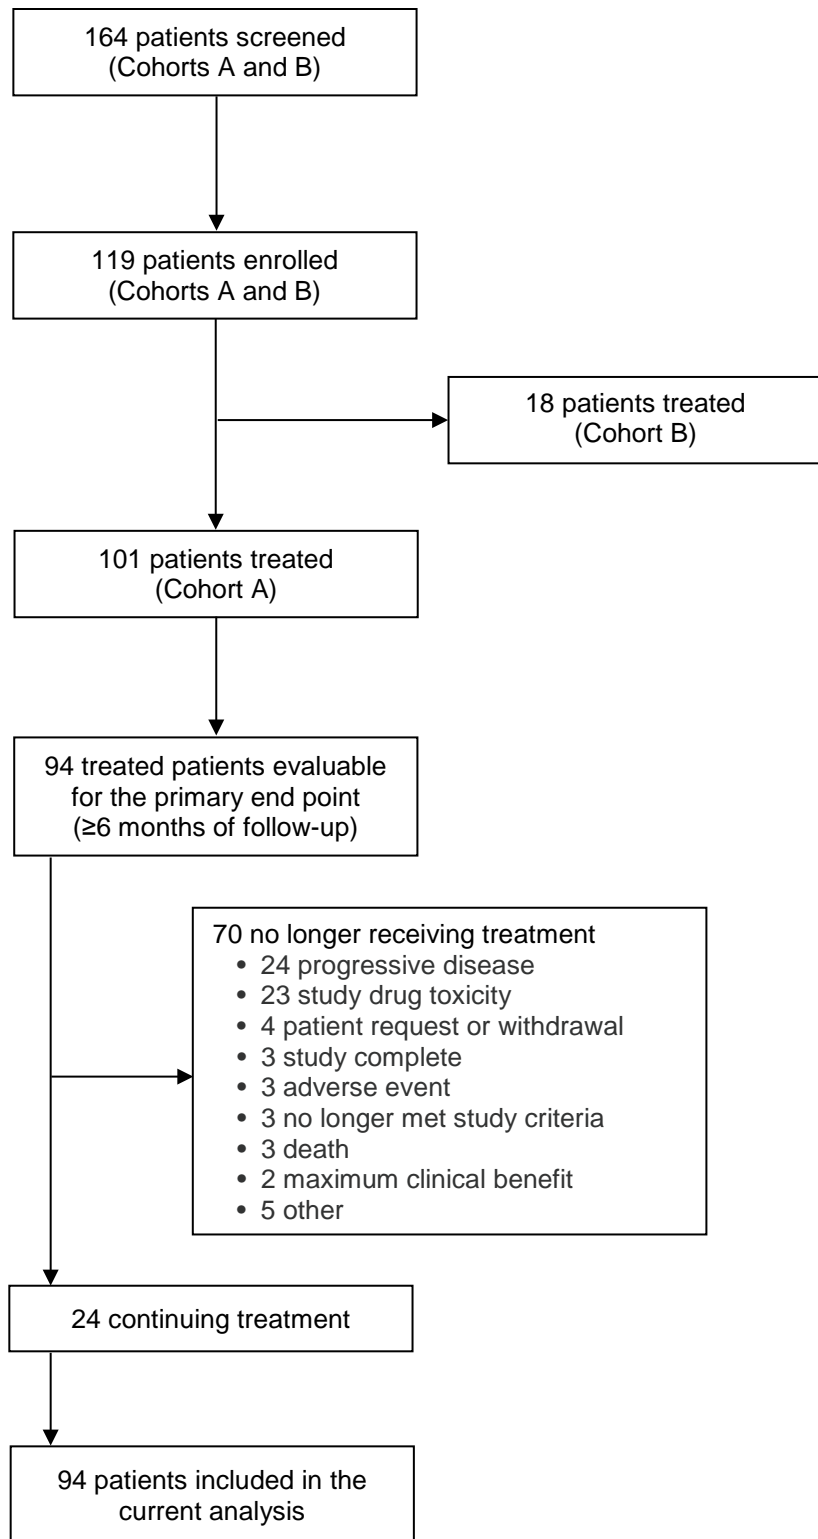

**Figure S3. Time to and Duration of Extracranial Response.**

Plot shows the onset and durability of extracranial objective responses to the combination of nivolumab and ipilimumab, according to modified RECIST version 1.1 criteria. Open circles indicate the first evidence of objective response and arrows indicate an ongoing response; 43 of 47 responses (91%) were ongoing at the time of the current analysis. Median time to response was 2.1 months (range, 1.1 to 15.0). The median duration of extracranial response has not been reached.

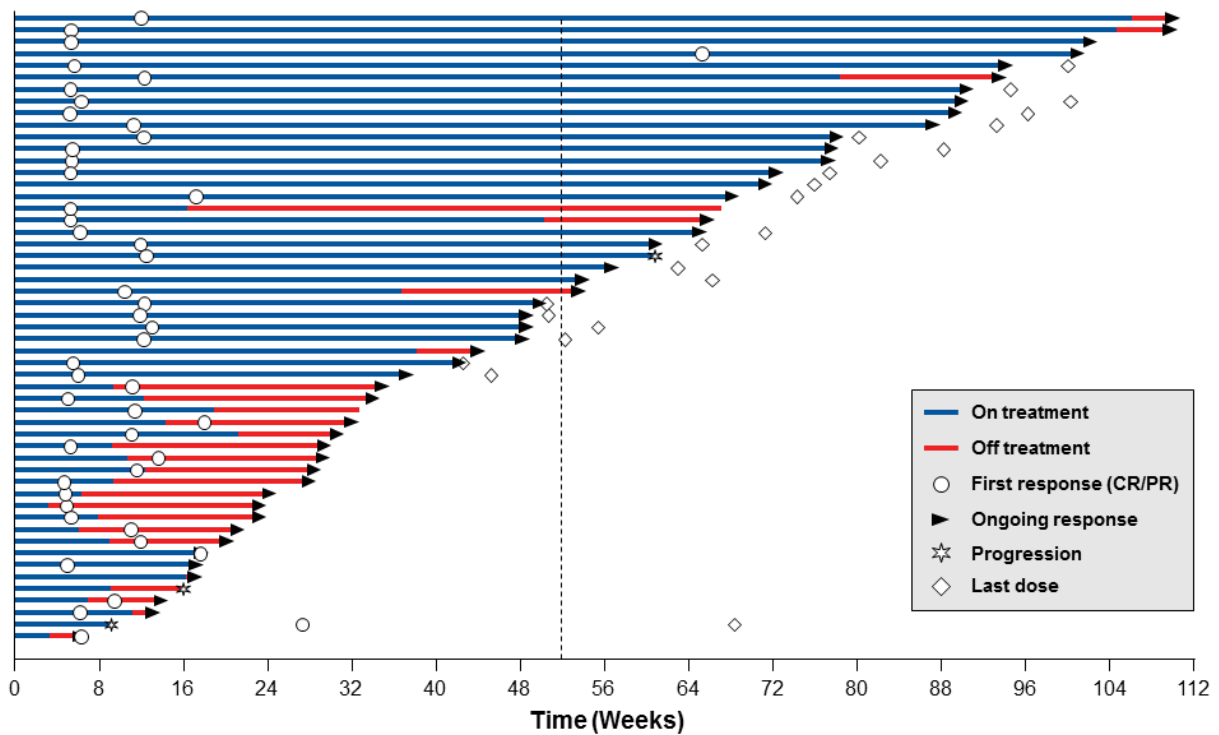

**Table S1. Subsequent Anti-cancer Therapies.**

|                                              | <b>Nivolumab plus ipilimumab<br/>(N=94)</b> |
|----------------------------------------------|---------------------------------------------|
| Patients who received any subsequent therapy | 25 (26.6)                                   |
| Radiotherapy                                 | 15 (16.0)                                   |
| Stereotactic radiotherapy                    | 4 (4.3)                                     |
| Systemic therapy                             | 13 (13.8)                                   |
| Anti-CTLA-4 agent (ipilimumab)               | 2 (2.1)                                     |
| Anti-PD-1 agent                              | 8 (8.5)                                     |
| Nivolumab                                    | 7 (7.4)                                     |
| Pembrolizumab                                | 1 (1.1)                                     |
| BRAF inhibitor (dabrafenib)                  | 7 (7.4)                                     |
| MEK/NRAS inhibitor (trametinib)              | 6 (6.4)                                     |

**Table S2. Demographic and Clinical Characteristics of the Patients at Baseline.**

| <b>Characteristic</b>                   | <b>Nivolumab plus Ipilimumab<br/>(N=94)</b> |
|-----------------------------------------|---------------------------------------------|
| Age – yr                                |                                             |
| Median (range)                          | 59 (22–81)                                  |
| Age category – no. (%)                  |                                             |
| <65 yr                                  | 62 (66.0)                                   |
| ≥65 yr                                  | 32 (34.0)                                   |
| Sex – no. (%)                           |                                             |
| Male                                    | 65 (69.1)                                   |
| Female                                  | 29 (30.9)                                   |
| Lactate dehydrogenase – no. (%)         |                                             |
| ≤ULN                                    | 55 (58.5)                                   |
| >ULN                                    | 39 (41.5)                                   |
| ≤2x ULN                                 | 83 (88.3)                                   |
| >2x ULN                                 | 11 (11.7)                                   |
| <i>BRAF</i> status – no. (%)            |                                             |
| Mutation                                | 54 (57.4)                                   |
| No mutation                             | 25 (26.6)                                   |
| Unknown                                 | 15 (16.0)                                   |
| <i>NRAS</i> status – no. (%)            |                                             |
| Mutation                                | 6 (6.4)                                     |
| No mutation                             | 17 (18.1)                                   |
| Unknown                                 | 71 (75.5)                                   |
| PD-L1 status – no. (%)                  |                                             |
| 1% cutoff                               |                                             |
| ≥1%                                     | 41 (43.6)                                   |
| <1%                                     | 34 (36.2)                                   |
| 5% cutoff                               |                                             |
| ≥5%                                     | 25 (26.6)                                   |
| <5%                                     | 50 (53.2)                                   |
| Could not be determined or not reported | 19 (20.2)                                   |
| SRT prior to study entry – no. (%)      |                                             |
| Yes                                     | 8 (8.5)                                     |



|                                               |           |
|-----------------------------------------------|-----------|
| No                                            | 86 (91.5) |
| Prior systemic cancer therapy – no. (%)       | 16 (17.0) |
| Dabrafenib                                    | 8 (8.5)   |
| Trametinib                                    | 8 (8.5)   |
| Vemurafenib                                   | 2 (2.1)   |
| Pre-treatment tumor assessment – intracranial |           |
| Target lesions – no. (%)                      |           |
| 0                                             | 1 (1.1)*  |
| 1                                             | 49 (52.1) |
| 2                                             | 23 (24.5) |
| ≥3                                            | 21 (22.3) |
| Largest individual target lesion – no. (%)    |           |
| <1 cm                                         | 33 (35.1) |
| ≥1–<2 cm                                      | 49 (52.1) |
| ≥2–<3 cm                                      | 10 (10.6) |
| ≥3 cm                                         | 2 (2.1)*  |

\*Protocol deviation. SRT denotes stereotactic radiotherapy.

**Table S3. Number of Target and Non-target Lesions at Baseline.**

| <b>Variable</b>                                                    | <b>Intracranial<br/>(N=94)</b> | <b>Extracranial<br/>(N=94)</b> | <b>Global<br/>(N=94)</b> |
|--------------------------------------------------------------------|--------------------------------|--------------------------------|--------------------------|
| Target lesions – no. (%)                                           |                                |                                |                          |
| 0                                                                  | 1 (1.1)*                       | 15 (16.0)                      | 0                        |
| 1                                                                  | 49 (52.1)                      | 16 (17.0)                      | 10 (10.6)                |
| 2                                                                  | 23 (24.5)                      | 20 (21.3)                      | 12 (12.8)                |
| 3                                                                  | 8 (8.5)                        | 14 (14.9)                      | 13 (13.8)                |
| 4                                                                  | 6 (6.4)                        | 14 (14.9)                      | 14 (14.9)                |
| ≥5                                                                 | 7 (7.4)                        | 15 (16.0)                      | 45 (47.9)                |
| Non-target lesions – no. (%)                                       |                                |                                |                          |
| 0                                                                  | 52 (55.3)                      | 26 (27.7)                      | 18 (19.1)                |
| 1                                                                  | 26 (27.7)                      | 22 (23.4)                      | 20 (21.3)                |
| 2                                                                  | 6 (6.4)                        | 13 (13.8)                      | 15 (16.0)                |
| 3                                                                  | 3 (3.2)                        | 15 (16.0)                      | 9 (9.6)                  |
| 4                                                                  | 3 (3.2)                        | 6 (6.4)                        | 7 (7.4)                  |
| ≥5                                                                 | 4 (4.3)                        | 12 (12.8)                      | 25 (26.6)                |
| Sum of reference diameters of target lesions (mm) – median (range) | 15.0 (5–91)                    | 65.2 (12–361)                  | 76.7 (5–381)             |

\*Protocol deviation.

**Table S4. Intracranial Response by Number of Baseline Target Lesions.**

| <b>No. of target lesions</b> | <b>No. of patients (N=94)</b> | <b>BOR – no.</b> |           |                     | <b>ORR, % (n/N)</b> |
|------------------------------|-------------------------------|------------------|-----------|---------------------|---------------------|
|                              |                               | <b>CR</b>        | <b>PR</b> | <b>SD ≥6 months</b> |                     |
| <b>0</b>                     | 1*                            | 0                | 0         | 0                   | 0                   |
| <b>1</b>                     | 49                            | 15               | 11        | 2                   | 53.1 (26/49)        |
| <b>2</b>                     | 23                            | 6                | 10        | 0                   | 69.6 (16/23)        |
| <b>3</b>                     | 8                             | 1                | 1         | 0                   | 25.0 (2/8)          |
| <b>4</b>                     | 6                             | 1                | 3         | 0                   | 66.7 (4/6)          |
| <b>≥5</b>                    | 7                             | 1                | 3         | 0                   | 57.1 (4/7)          |

\*Protocol deviation.

**Table S5. Subgroup Analyses of Intracranial Objective Response Rate and Clinical Benefit Rate.**

| Subgroup              | N  | Objective Response Rate |                  | Clinical Benefit Rate |                  |
|-----------------------|----|-------------------------|------------------|-----------------------|------------------|
|                       |    | n                       | % (95% CI)       | n                     | % (95% CI)       |
| All patients          | 94 | 52                      | 55.3 (44.7–65.6) | 54                    | 57.4 (46.8–67.6) |
| Age                   |    |                         |                  |                       |                  |
| <65 yr                | 62 | 37                      | 59.7 (46.4–71.9) | 38                    | 61.3 (48.1–73.4) |
| ≥65 yr                | 32 | 15                      | 46.9 (29.1–65.3) | 16                    | 50.0 (31.9–68.1) |
| Sex                   |    |                         |                  |                       |                  |
| Male                  | 65 | 35                      | 53.8 (41.0–66.3) | 37                    | 56.9 (44.0–69.2) |
| Female                | 29 | 17                      | 58.6 (38.9–76.5) | 17                    | 58.6 (38.9–76.5) |
| Lactate dehydrogenase |    |                         |                  |                       |                  |
| ≤ULN                  | 55 | 26                      | 47.3 (33.7–61.2) | 28                    | 50.9 (37.1–64.6) |
| >ULN                  | 39 | 26                      | 66.7 (49.8–80.9) | 26                    | 66.7 (49.8–80.9) |
| ≤2x ULN               | 83 | 47                      | 56.6 (45.3–67.5) | 49                    | 59.0 (47.7–69.7) |
| >2x ULN               | 11 | 5                       | 45.5 (16.7–76.6) | 5                     | 45.5 (16.7–76.6) |
| <i>BRAF</i> status    |    |                         |                  |                       |                  |
| Mutation              | 54 | 31                      | 57.4 (43.2–70.8) | 32                    | 59.3 (45.0–72.4) |
| No mutation           | 25 | 10                      | 40.0 (21.1–61.3) | 11                    | 44.0 (24.4–65.1) |
| Unknown               | 15 | 11                      | 73.3 (44.9–92.2) | 11                    | 73.3 (44.9–92.2) |
| <i>NRAS</i> status    |    |                         |                  |                       |                  |
| Mutation              | 6  | 3                       | 50.0 (11.8–88.2) | 4                     | 66.7 (22.3–95.7) |
| No mutation           | 17 | 7                       | 41.2 (18.4–67.1) | 7                     | 41.2 (18.4–67.1) |
| Unknown               | 71 | 42                      | 59.2 (46.8–70.7) | 43                    | 60.6 (48.3–72.0) |
| PD-L1 status*         |    |                         |                  |                       |                  |

|                                  |    |    |                  |    |                  |
|----------------------------------|----|----|------------------|----|------------------|
| 1% cutoff                        |    |    |                  |    |                  |
| ≥1%                              | 41 | 24 | 58.5 (42.1–73.7) | 25 | 61.0 (44.5–75.8) |
| <1%                              | 34 | 17 | 50.0 (32.4–67.6) | 18 | 52.9 (35.1–70.2) |
| 5% cutoff                        |    |    |                  |    |                  |
| ≥5%                              | 25 | 18 | 72.0 (50.6–87.9) | 19 | 76.0 (54.9–90.6) |
| <5%                              | 50 | 23 | 46.0 (31.8–60.7) | 24 | 48.0 (33.7–62.6) |
| SRT prior to study entry         |    |    |                  |    |                  |
| Yes                              | 8  | 4  | 50.0 (15.7–84.3) | 4  | 50.0 (15.7–84.3) |
| No                               | 86 | 48 | 55.8 (44.7–66.5) | 50 | 58.1 (47.0–68.7) |
| No. of target lesions            |    |    |                  |    |                  |
| 1–2                              | 72 | 42 | 58.3 (46.1–69.8) | 44 | 61.1 (48.9–72.4) |
| ≥3                               | 21 | 10 | 47.6 (25.7–70.2) | 10 | 47.6 (25.7–70.2) |
| Largest individual target lesion |    |    |                  |    |                  |
| <1 cm                            | 33 | 19 | 57.6 (39.2–74.5) | 21 | 63.6 (45.1–79.6) |
| ≥1–<2 cm                         | 49 | 27 | 55.1 (40.2–69.3) | 27 | 55.1 (40.2–69.3) |
| ≥2–<3 cm                         | 10 | 5  | 50.0 (18.7–81.3) | 5  | 50.0 (18.7–81.3) |
| ≥3 cm**                          | 2  | 1  | 50.0 (1.3–98.7)  | 1  | 50.0 (1.3–98.7)  |

\*PD-L1 expression was assessed in extracranial tumor tissue using a validated immunohistochemical assay and a rabbit monoclonal antihuman PD-L1 antibody (clone 28-8) as described previously.<sup>11</sup>

\*\*Protocol deviation.

SRT denotes stereotactic radiotherapy.

**Table S6. Treatment-related Adverse Events.\***

| Event                                      | Nivolumab plus ipilimumab <sup>†</sup><br>(N=94) |           |
|--------------------------------------------|--------------------------------------------------|-----------|
|                                            | Any Grade                                        | Grade 3-4 |
|                                            | <i>number of patients with event (percent)</i>   |           |
| Treatment-related adverse event            | 90 (95.7)                                        | 52 (55.3) |
| Fatigue                                    | 45 (47.9)                                        | 4 (4.3)   |
| Increase in ALT level                      | 35 (37.2)                                        | 15 (16.0) |
| Maculopapular rash                         | 34 (36.2)                                        | 7 (7.4)   |
| Diarrhea                                   | 33 (35.1)                                        | 6 (6.4)   |
| Increased AST level                        | 32 (34.0)                                        | 14 (14.9) |
| Pruritus                                   | 28 (29.8)                                        | 0         |
| Nausea                                     | 26 (27.7)                                        | 2 (2.1)   |
| Headache                                   | 21 (22.3)                                        | 3 (3.2)   |
| Hypothyroidism                             | 20 (21.3)                                        | 1 (1.1)   |
| Arthralgia                                 | 19 (20.2)                                        | 0         |
| Decreased appetite                         | 16 (17.0)                                        | 1 (1.1)   |
| Pyrexia                                    | 16 (17.0)                                        | 0         |
| Increased lipase level                     | 14 (14.9)                                        | 8 (8.5)   |
| Hyperthyroidism                            | 12 (12.8)                                        | 3 (3.2)   |
| Vomiting                                   | 12 (12.8)                                        | 2 (2.1)   |
| Increased amylase level                    | 11 (11.7)                                        | 6 (6.4)   |
| Hypophysitis                               | 11 (11.7)                                        | 5 (5.3)   |
| Myalgia                                    | 19 (10.6)                                        | 0         |
| Generalized pruritus                       | 9 (9.6)                                          | 0         |
| Pneumonitis                                | 8 (8.5)                                          | 2 (2.1)   |
| Rash                                       | 8 (8.5)                                          | 2 (2.1)   |
| Anemia                                     | 8 (8.5)                                          | 1 (1.1)   |
| Increased blood alkaline phosphatase level | 8 (8.5)                                          | 0         |

|                                 |         |         |
|---------------------------------|---------|---------|
| Cough                           | 8 (8.5) | 0       |
| Colitis                         | 7 (7.4) | 7 (7.4) |
| Abdominal pain                  | 7 (7.4) | 1 (1.1) |
| Adrenal insufficiency           | 6 (6.4) | 1 (1.1) |
| Increased blood bilirubin level | 6 (6.4) | 1 (1.1) |
| Decreased platelet count        | 6 (6.4) | 0       |
| Decreased weight                | 6 (6.4) | 0       |
| Night sweats                    | 6 (6.4) | 0       |
| Skin hypopigmentation           | 6 (6.4) | 0       |
| Hyponatremia                    | 5 (5.3) | 1 (1.1) |
| Blurred vision                  | 5 (5.3) | 0       |
| Hypokalemia                     | 5 (5.3) | 0       |
| Chills                          | 5 (5.3) | 0       |
| Vitiligo                        | 5 (5.3) | 0       |
| Decreased lymphocyte count      | 4 (4.3) | 1 (1.1) |
| Influenza-like illness          | 4 (4.3) | 1 (1.1) |
| Hypotension                     | 3 (3.2) | 2 (2.1) |
| Macular rash                    | 3 (3.2) | 1 (1.1) |
| Increased transaminases         | 2 (2.1) | 2 (2.1) |
| Brain edema                     | 2 (2.1) | 2 (2.1) |
| Dehydration                     | 2 (2.1) | 2 (2.1) |
| Intracranial hemorrhage         | 2 (2.1) | 1 (1.1) |
| Myositis                        | 2 (2.1) | 1 (1.1) |
| Pancreatitis                    | 2 (2.1) | 1 (1.1) |
| Acute hepatitis                 | 1 (1.1) | 1 (1.1) |
| Acute kidney injury             | 1 (1.1) | 1 (1.1) |
| Autoimmune hepatitis            | 1 (1.1) | 1 (1.1) |
| Autoimmune pancreatitis         | 1 (1.1) | 1 (1.1) |
| Cytokine release syndrome       | 1 (1.1) | 1 (1.1) |

|                                                             |           |           |
|-------------------------------------------------------------|-----------|-----------|
| Decreased blood phosphorus level                            | 1 (1.1)   | 1 (1.1)   |
| Duodenitis                                                  | 1 (1.1)   | 1 (1.1)   |
| Gastritis                                                   | 1 (1.1)   | 1 (1.1)   |
| Rhabdomyolysis                                              | 1 (1.1)   | 1 (1.1)   |
| Syncope                                                     | 1 (1.1)   | 1 (1.1)   |
| Type I diabetes mellitus                                    | 1 (1.1)   | 1 (1.1)   |
| Uveitis                                                     | 1 (1.1)   | 1 (1.1)   |
| Treatment-related adverse events leading to discontinuation | 25 (26.6) | 19 (20.2) |

\*Shown are treatment-related adverse events of any grade that occurred in at least 5% of the patients and treatment-related adverse events of grade 3 or 4 that occurred in at least one patient who received nivolumab plus ipilimumab. The severity of adverse events was graded according to the National Cancer Institute Common Terminology Criteria for Adverse Events, version 4.0. ALT denotes alanine aminotransferase, and AST aspartate aminotransferase.

†One patient died due to grade 5 myocarditis.



**Table S7. Adverse Events in the Central Nervous System.\***

| Event                               | Nivolumab plus ipilimumab<br>(N=94)                         |           |
|-------------------------------------|-------------------------------------------------------------|-----------|
|                                     | Any Grade<br><i>number of patients with event (percent)</i> | Grade 3-4 |
| Any treatment-related adverse event | 34 (36.2)                                                   | 7 (7.4)   |
| Headache                            | 21 (22.3)                                                   | 3 (3.2)   |
| Paraesthesia                        | 4 (4.3)                                                     | 0         |
| Dysgeusia                           | 3 (3.2)                                                     | 0         |
| Brain edema                         | 2 (2.1)                                                     | 2 (2.1)   |
| Intracranial hemorrhage             | 2 (2.1)                                                     | 1 (1.1)   |
| Aphasia                             | 2 (2.1)                                                     | 0         |
| Seizure                             | 2 (2.1)                                                     | 0         |
| Syncope                             | 1 (1.1)                                                     | 1 (1.1)   |
| Dizziness                           | 1 (1.1)                                                     | 0         |
| Tremor                              | 1 (1.1)                                                     | 0         |

\*The severity of adverse events was graded according to the National Cancer Institute Common Terminology Criteria for Adverse Events, version 4.0.
